# Supplementary material for: A clocked finite state machine built from DNA
Source: Royal Society of Chemistry journal article supplement (doi:10.1039/c2cc37227d), 2012-11-15
Supplement: c2cc37227d.pdf [file c2cc37227d.pdf]

Supporting Information for ‘A clocked finite state machine built from DNA’

1. DNA sequences

| Transition Rules |                                                              |
|------------------|--------------------------------------------------------------|
| $T_{(1-2)}^a$    | CATTTTAGTTACGAAGATAGCGGTGGAATGTGGCTATTATCCACACACCACCGCTATCT  |
| $T_{(2-1)}^b$    | CGCTATCTCCACACACCACCTAAAATGGTGAATGTGGAGATAGCGAGTCTTGATAATAG  |
| $T_{(3-4)}^a$    | TATTGATATTACGAAGATAGCGGTGGAATGTGGTTATTCCTCCACACACCACCGCTATCT |
| $T_{(3-2)}^c$    | TATTGATATTAGCAAGATAGCGGTGGAATGTGGCTATTATCCACACACCACCGCTATCT  |
| $T_{(4-3)}^b$    | CGCTATCTCCACACACCACATCAATAAGTGAATGTGGAGATAGCGAGTCTTAGGAATAA  |
| Inputs           |                                                              |
| $I_a$            | CCACATTCCACCGCTATCTTCGTGTGGTGTGTGGTTGACTCTTGGTA              |
| $I_b$            | ATGGTTCTCAGTTTGTGGTGTGTGGGACTCGCTATCTCCACATTCCAC             |
| $I_c$            | CCACATTCCACCGCTATCTTGCTGTGGTGTGTGGTTGACTCTTGGTA              |
| Clocks           |                                                              |
| $C_0$            | TACCAAGAGTCAAGATAGCG                                         |
| $C_1$            | AGATAGCGACTGAGAACCAT                                         |
| Reporters        |                                                              |
| $R_1$            | Cy5-TATGATTTTAGGTGGCATA-Iowa Black RQ                        |
| $R_4$            | Iowa Black RQ-AGCAGTGGATAAGGATGCT-Cy3                        |
| Initiators       |                                                              |
| $S_1$            | CGCTATCTCCACACACCACCTAAAATG                                  |
| $S_3$            | CGCTATCTCCACACACCACATCAATA                                   |
| $OH_3$           | TTATTCCCTAAGACTCGCTATCTCCACATTCCAC                           |
| $OH_4$           | CCACATTCCACCGCTATCTTCGTAATATCAATA                            |

Underlined sequences indicate the position of the mismatches in the stem of the transition and input strands that are repaired when incorporated into the polymer.

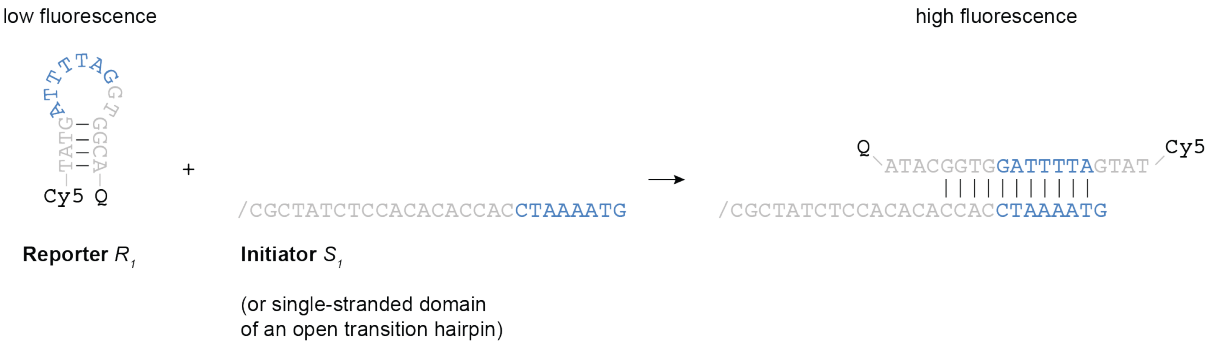

**Figure S1.** The molecular beacon  $R_1$  is used to report State 1. It is a stem-loop structure labeled at opposite ends with a fluorophore and a quencher (Q). The loop and part of the neck of the  $R_1$  are complementary to the single-stranded sequence that is displayed at the end of the growing polymer when the state machine is in State 1. An increase in fluorescence is seen when the reporter hybridizes to its target sequence because the separation between fluorophore and quencher increases. When the state changes, the molecular beacon is released and the fluorescence signal is quenched as the stem-loop structure refolds. The reporter  $R_4$  is designed to report State 4 in a similar way.

2. Methods

DNA components were resuspended to a concentration of 100  $\mu\text{M}$  in TE buffer (10 mM Tris•HCl, 0.5 mM EDTA pH 8.0). Fluorescence experiments were performed at 25°C in TE buffer supplemented with 0.5 M NaCl. Reactions were prepared by adding 1.5  $\mu\text{L}$  of each component to 150  $\mu\text{M}$  of buffer to give a final concentration of  $\sim 1\mu\text{M}$ . The clock strands  $C_0$  and  $C_1$  were added alternately at 20-minute intervals in stoichiometric quantity. The initial components present in each experiment presented in the manuscript are listed below:

**Fig. 2A** Initiator  $S_1$ , Input  $I_a$  (2x) and  $I_b$  (2x), Transition Rules  $T_{(1-2)}^a$  (2x) and  $T_{(2-1)}^b$  (2x), Reporter  $R_1$

**Fig. 2B** Initiator  $S_3$ , Input  $I_a$  (2x) and  $I_b$  (2x), Transition Rules  $T_{(3-4)}^a$  (2x) and  $T_{(4-3)}^b$  (2x), Reporter  $R_4$

**Fig. 2C** Initiator  $S_1$  and  $S_3$ , Input  $I_a$  (4x) and  $I_b$  (4x), Transition Rules  $T_{(1-2)}^a$  (2x),  $T_{(2-1)}^b$  (2x),  $T_{(3-4)}^a$  (2x),  $T_{(4-3)}^b$  (2x), Reporter  $R_1$  and  $R_4$

**Fig. 3A** Initiator  $S_3$ , Transition Rules  $T_{(3-2)}^c$ ,  $T_{(2-1)}^b$ ,  $T_{(3-4)}^a$ ,  $T_{(4-3)}^b$ , Input  $I_a$  and  $I_b$ , Reporter  $R_1$  and  $R_4$

**Fig. 3B** Initiator  $S_3$ , Transition Rules  $T_{(3-2)}^c$ ,  $T_{(2-1)}^b$ ,  $T_{(3-4)}^a$ ,  $T_{(4-3)}^b$ , Input  $I_b$  and  $I_c$ , Reporter  $R_1$  and  $R_4$

### 3. Clocked reaction kinetics compared to the un-clocked reaction kinetics

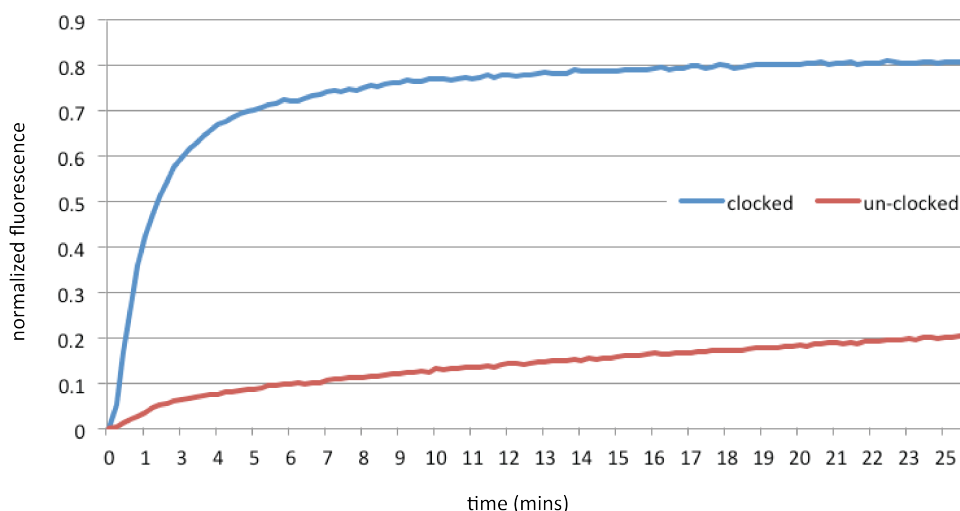

**Figure S2. Clocked versus un-clocked state transition.** Clocked and un-clocked reactions were prepared with the following components: transition hairpins  $T_{(3-4)}^a$ ,  $T_{(4-3)}^b$ , reporter  $R_4$  and  $OH_3$  (a strand that is designed to open the transition hairpin  $T_{(4-3)}^b$ ). At  $t=0$  minutes, input  $I_a$  and clock  $C_0$  were added to the clocked reaction, whereas only input  $I_a$  was added to the un-clocked reaction. The fluorescence signal was normalized by setting the initial fluorescence to 0 and the signal for fully opened  $R_4$  to 1 (the signal for fully opened  $R_4$  was measured using  $OH_4$  to open  $T_{(3-4)}^a$ ). After 20 minutes the clocked reaction (blue line) reached ~80% completion and the un-clocked reaction reached ~20% completion (red line).
